# Supplementary material
Source: PubMed Central journal article supplement (PMC3243752)
Supplement: NIHMS207582-supplement-01.pdf [file NIHMS207582-supplement-01.pdf]

## **Zhang et al., Inventory of Supplemental Information**

### ***Supplemental Figures 1-8***

**Figure S1.** Analysis of mIPSC and mRNA levels in hippocampal neurons infected with lentivirus expressing neurexin-2 $\beta$ ; related to Figure 1.

**Figure S2.** Analysis of mIPSC and synapse number in hippocampal neurons transfected with a vector expressing neurexin-2 $\beta$ ; related to Figure 2.

**Figure S3.** Analysis of IPSCs in hippocampal neurons transfected with Nr $x$ -2 $\beta$  expression and control vectors, and treated for 48 hrs with pharmacological agents that either activate or silence the neurons, to test the effect of synaptic activity on the IPSC-inhibitory action of neurexin-2 $\beta$ ; related to Figure 3.

**Figure S4.** Presents control experiments demonstrating that the NL2 KO does not produce a suppression of IPSCs in cultured neurons (A), that a pan-neurexin knockdown restricted to a postsynaptic neuron does not alter the synaptic strength of inhibitory synapses (B-F), and that truncated neurexin-2 $\beta$  ending with a KDEL sequence still binds to neuroligin-1 effectively but becomes retained in the ER (G-I); related to Figure 4.

**Figure S5.** EPSCs and IPSCs measurements of cultured hippocampal neurons treated with recombinant Ig-neurexin-1 $\beta$  (IgNr $x$ -1 $\beta$ ) or control fusion protein (IgC), and protein quantitations of such neurons; and related to Figure 5.

**Figure S6.** Extensive additional control affinity chromatography experiments using immobilized Ig- or GST-fusion proteins, related to Figure 6.

**Figure S7.** Affinity chromatography experiments of the binding of endogenous brain GABA $_A$  $\alpha$ 1 and NL1 to immobilized Ig-neurexin-1 $\beta$  or IgC control fusion protein, related to Figure 7.

**Figure S8.** Lack of changes in apparent GABA-affinity from HEK293 cells stably expressing GABA $_A$  receptors transfected with either control or Neurexin-2 $\beta$ , related to Figure 8.

### ***Supplemental Tables S1-S4***

**Table S1,** related to Figure 1-5. Passive membrane parameters (membrane capacitance (Cm), membrane resistance (Rm) and access resistance (Rs) in cultured neurons

**Table S2,** related to Figure 6. Numerical summary of results of affinity chromatography experiments

**Table S3,** related to Figures 1-5, 8 and Figures S1-S5 and S8. Numerical summary of values obtained in the electrophysiological experiments, as depicted in the main and supplementary figures, to allow independent assessment of raw data by others.

**Table S4,** related to all Figures. Summary of constructs/expressed proteins used in this study.

### ***Supplemental Experimental Procedures***

Detailed description of all experimental procedures to allow others to follow our experimental protocols

### ***Supplemental References***

References unique to the Supplementary Materials.

## Supplemental Information for Zhang et al., “Neurexins Physically and Functionally Interact with GABA<sub>A</sub>α1-receptors”

### Supplemental Figures

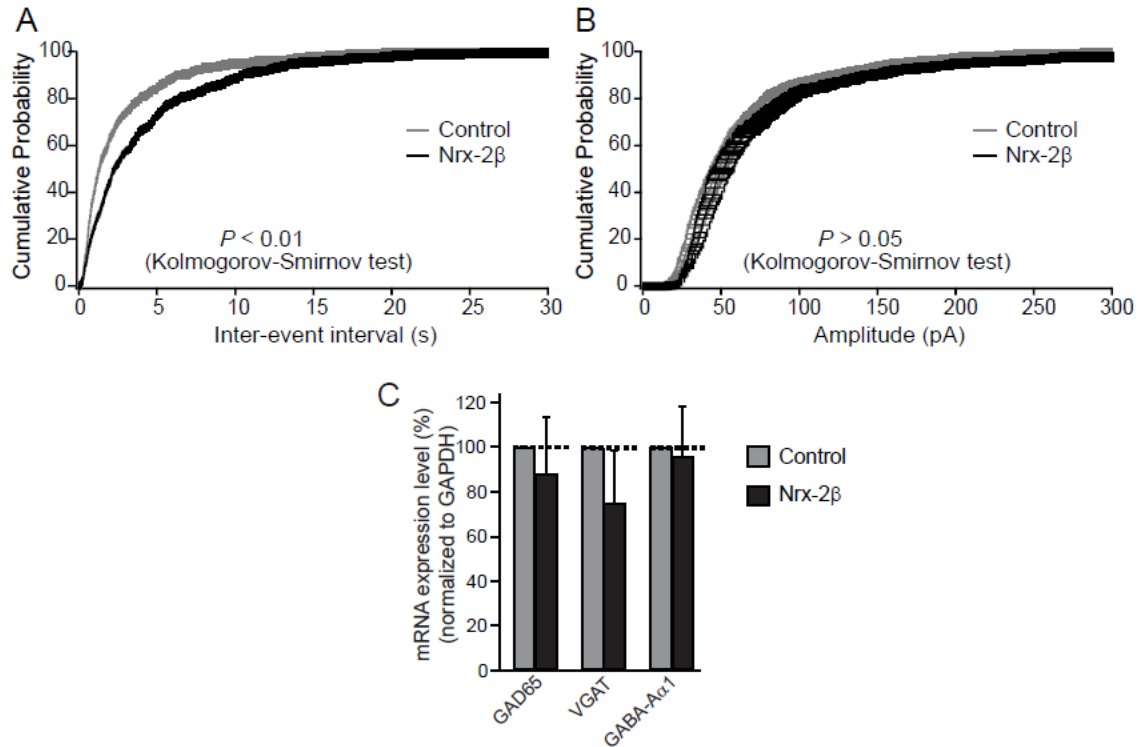

**Figure S1**

**Analysis of hippocampal neurons infected with lentiviruses expressing EGFP (control) or neurexin-2 $\beta$ : mIPSC parameters analyzed using cumulative probability plots (A and B), and mRNA levels determined using quantitative PCR (C) (related to Figure 1)**

**A and B.** Cumulative graphs of the mIPSC inter-event interval (A) and amplitude (B) in hippocampal cultured neurons infected with lentiviruses expressing neurexin-2 $\beta$  (Nr-x-2 $\beta$ ) or EGFP (control). Statistical comparisons were made by Kolmogorov-Smirnov test. Note that there is no significant difference in the distribution of mIPSCs amplitude (control: n=29/3; Nr-x-2 $\beta$ : n=27/3).

**C.** Measurements of the mRNA levels for GAD65, VGAT, and GABA<sub>A</sub>α1-receptor using quantitative rt-PCR in neurons treated as described in the legend to Figure 1 (n=3 independent cultures). Summary graphs show means  $\pm$  SEMs; statistical comparisons were made by Student's t-test, and no significant differences were detected.

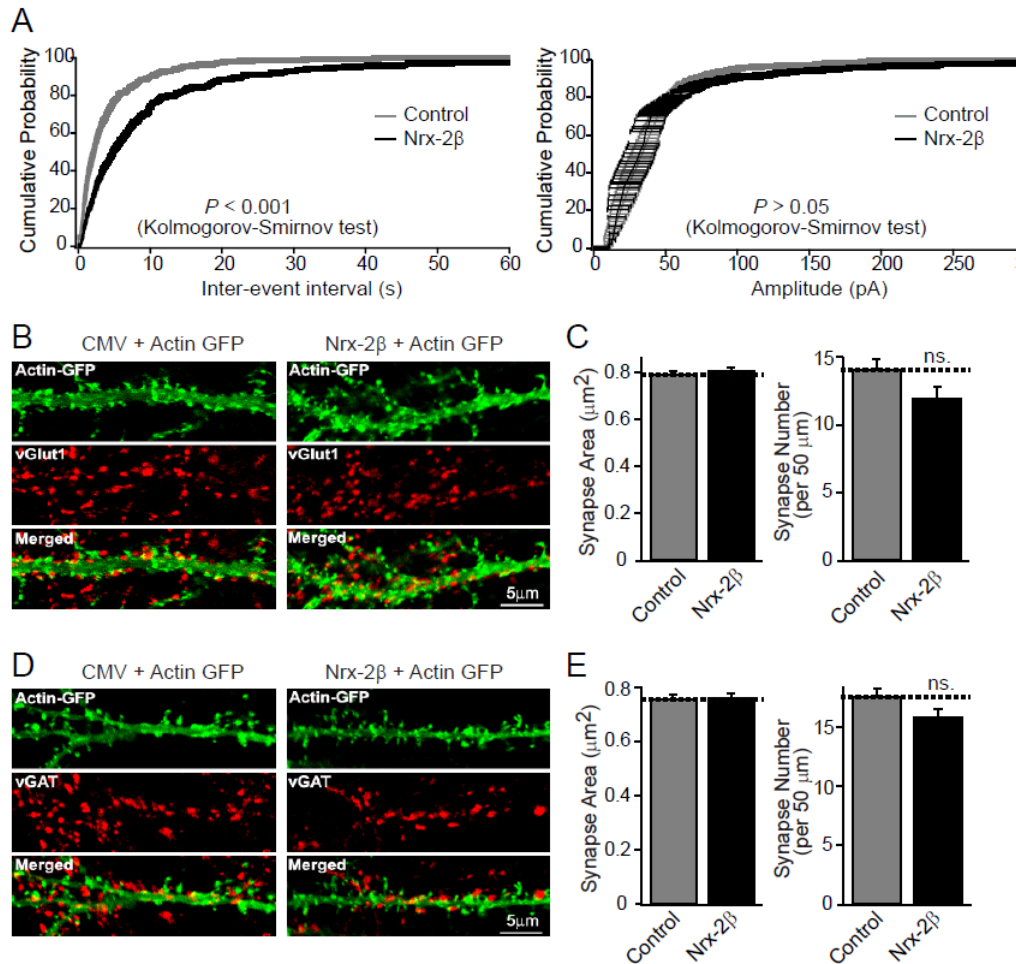

Figure S2

**Analysis of mIPSCs (A) and of synapse numbers (C-E) in transfected hippocampal neurons expressing neurexin-2 $\beta$  (related to Figure 2)**

**A.** Cumulative probability plots of the mIPSC inter-event interval (left) and amplitude (right) in hippocampal cultured neurons transfected with a CFP expression plasmid and either an empty vector (control), or a vector encoding neurexin-2 $\beta$  (Nr $x$ -2 $\beta$ ). Statistical comparisons were made by Kolmogorov-Smirnov test (control: n=26/3; Nr $x$ -2 $\beta$ : n=24/3).

**B.** Representative fluorescence images of neurons transfected with vectors expressing an actin-EGFP fusion protein alone (control), or together with neurexin-2 $\beta$  (Nr $x$ -2 $\beta$ ). Images show the EGFP fluorescence (green), vGLUT1 immunofluorescence labeling (red), and the merged view. Calibration bar applies to all panels.

**C.** Quantitations of the size (left) and density (right) of vGLUT1-positive synapses on dendrites of transfected neurons (control: n = 62/4 neurons/cultures; Nr $x$ -2 $\beta$ : n = 62/4).

**D.** Same as B, except that the neurons were stained for VGAT instead of vGLUT1.

**E.** Quantitations of the size (left) and density (right) of vGAT-positive synapses on dendrites of transfected neurons (control: n = 64/4 neurons/cultures; Nr $x$ -2 $\beta$ : n = 64/4).

For C and D, data shown are means  $\pm$  SEMs. Statistical significance was determined by Student's t test (n.s., non-significant).

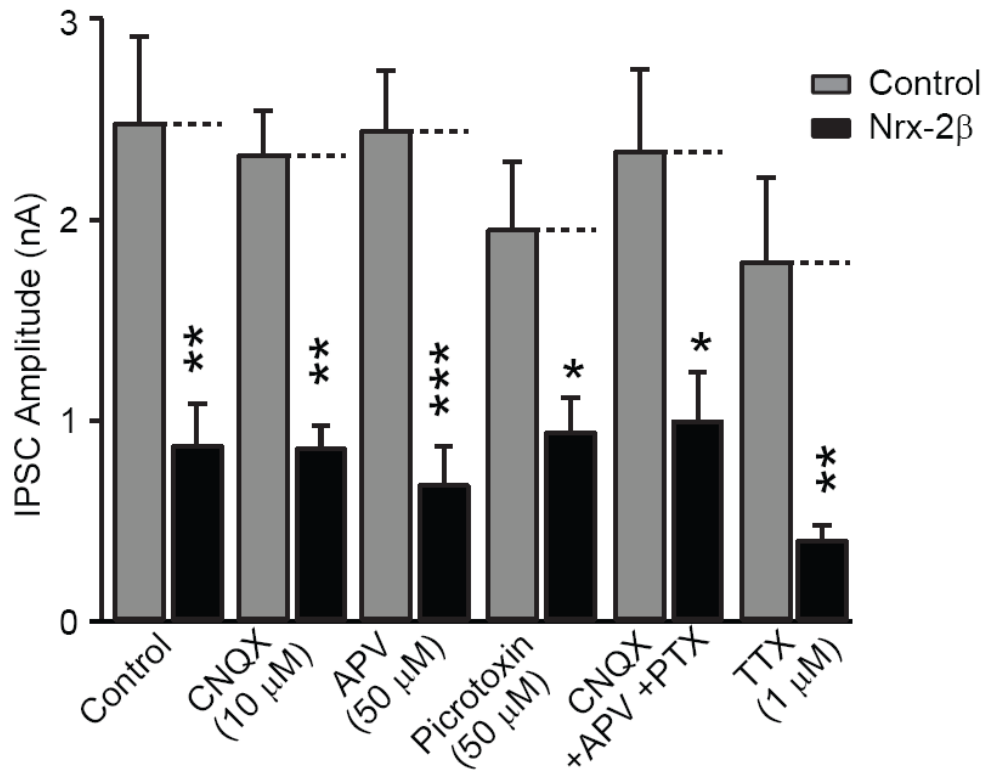

Figure S3

**Neuronal activity does not alter the decrease in IPSCs induced by overexpression of neurexin-2β (related to Figure 3)**

Summary graphs of the amplitudes of evoked IPSCs from neurons transfected with CFP expression plasmid and either an empty vector (control), or a vector encoding neurexin-2β (Nrx-2β). Cultured hippocampal neurons were transfected at DIV10, and treated with the indicated drugs from DIV10 to DIV14, except for the tetrodotoxin (TTX) group which was treated from DIV12 to DIV14 (untreated group: control, n = 9/3; Nrx-2β: n = 10/3; CNQX group: control, n = 14/3; Nrx-2β: n = 14/3; APV group: control, n = 21/3; Nrx-2β: n = 24/3; Picrotoxin group: control, n = 12/3; Nrx-2β: n = 14/3; CNQX + APV + PTX group: control, n = 18/3; Nrx-2β: n = 15/3; TTX group: control, n = 12/3; Nrx-2β: n = 15/3). Abbreviations used: CNQX, 6-cyano-7-nitro-quinoxaline-2,3-dione; APV, 5-amino-phosphono valerate; PTX, picrotoxin; TTX, tetrodotoxin. All data shown are means ± SEMs. Statistical significance was determined by Student's t test (compared to control; \* = p < 0.05; \*\* = p < 0.01; \*\*\* = p < 0.001)..

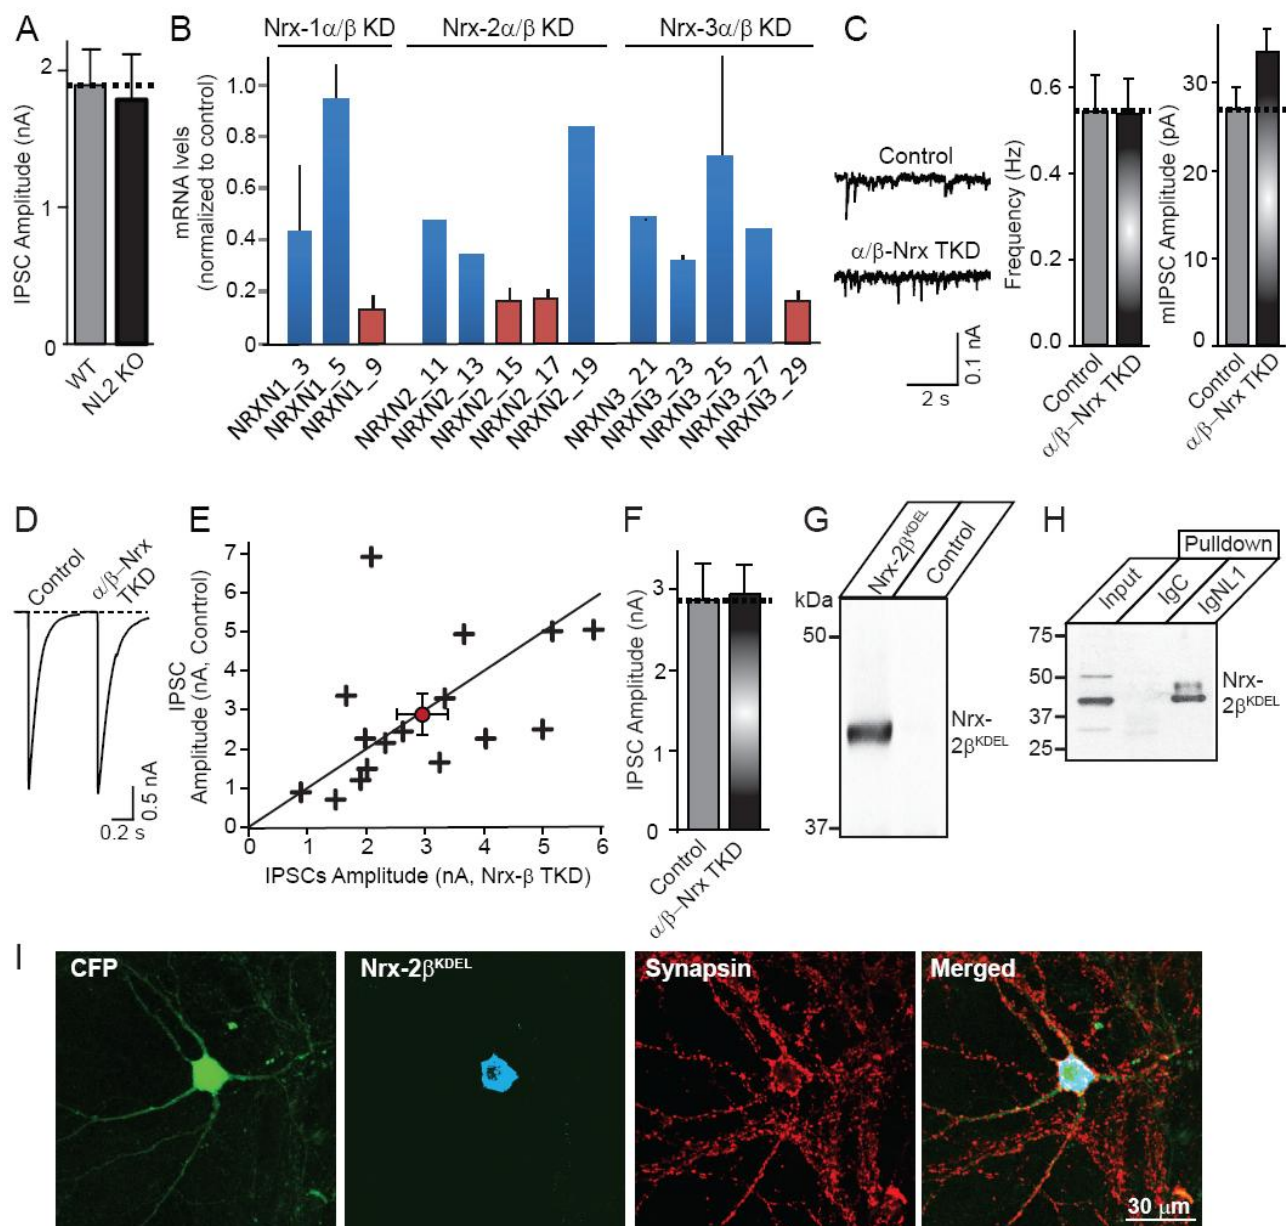

**Figure S4**

**Control experiments ensuring that the inhibitory effect of neurexin-2 $\beta$  on inhibitory synaptic strength does not depend on neuroligin-2, but does require transport of neurexin-2 $\beta$  to the cell-surface without an intracellular action (related to Figure 3)**

**A.** Mean amplitudes of IPSCs recorded from hippocampal neurons cultured from littermate wild-type (WT) and neuroligin-2 KO mice (NL2 KO) (control,  $n = 7/2$ ; NL2 KO:  $n = 7/2$ ). Note that in culture, neuroligin-2 KO neurons do not exhibit a major phenotype themselves.

**B.** Measurements of the mRNA levels for neurexin-1, -2 and -3 in cortical neurons after expression of shRNAs targeting the corresponding neurexin. Neurons were infected with lentiviruses expressing the indicated shRNAs at DIV4, and the levels of the corresponding mRNAs were measured by quantitative rt-PCR at DIV13. Note that the NRX1\_3 shRNA

corresponds to the commercial shRNA (Open Biosystems) used in a previous paper (de Wit et al., 2009).

**C.** Sample traces of mIPSCs recorded from neurons co-transfected with a CFP expression plasmid and three vectors encoding shRNA against neurexin-1, -2 and -3 (NRXN1\_9, NRXN2\_15 and NRXN3\_29), and neighboring non-transfected neurons as controls (left), and summary graphs of the frequency (middle) and amplitudes (right) of mIPSCs. mIPSCs were recorded in 1  $\mu$ M TTX and 10  $\mu$ M CNQX (n=15 pairs/3 cultures).

**D.** and **E.** Representative traces (D) and two-dimensional plot (E) of IPSC amplitudes from pairs of neighboring neurons, one of which was co-transfected with three vectors encoding CFP and shRNAs against neurexin-1, -2 and -3. The red circle shows that means  $\pm$  SEMs (n=16 pairs/4 cultures).

**F.** Bar diagram of the means  $\pm$  SEMs from the data shown in E.

**G.** Representative immunoblot of proteins from HEK293 cells that were transfected with control vector, or a vector expressing myc-tagged neurexin-2 $\beta$  in which a KDEL sequence followed by a stop codon was inserted into the protein at the O-linked sugar region (Nrx-2 $\beta$ <sup>KDEL</sup>; C-terminal sequence: RESSSTEQKLISEEDLKDEL-stop; analyzed by immunoblotting for the myc-tag).

**H.** Pulldown of Nrx-2 $\beta$ <sup>KDEL</sup> expressed in transfected HEK293 cells by immobilized IgNL1. Ig-fusion proteins of a short N-terminal control sequence (IgC) and the extracellular sequences of neuroligin-1 (NL1) were immobilized, and used as an affinity matrix. Bound proteins were analyzed by immunoblotting for the myc-tag.

**I.** Representative fluorescence images of neurons transfected with a vector expressing ER-trapped neurexin-2 $\beta$  (Nrx-2 $\beta$ <sup>KDEL</sup>, myc-tagged) together with CFP. Images show the CFP (green), myc (blue), synapsin (red) immunofluorescence labeling and the merged view. Scale bars apply to all pictures. The data represent the full images for Figure 3.

All data shown are means  $\pm$  SEMs. Statistical significance was determined by Student's t test (no significant differences were detected in any comparison)

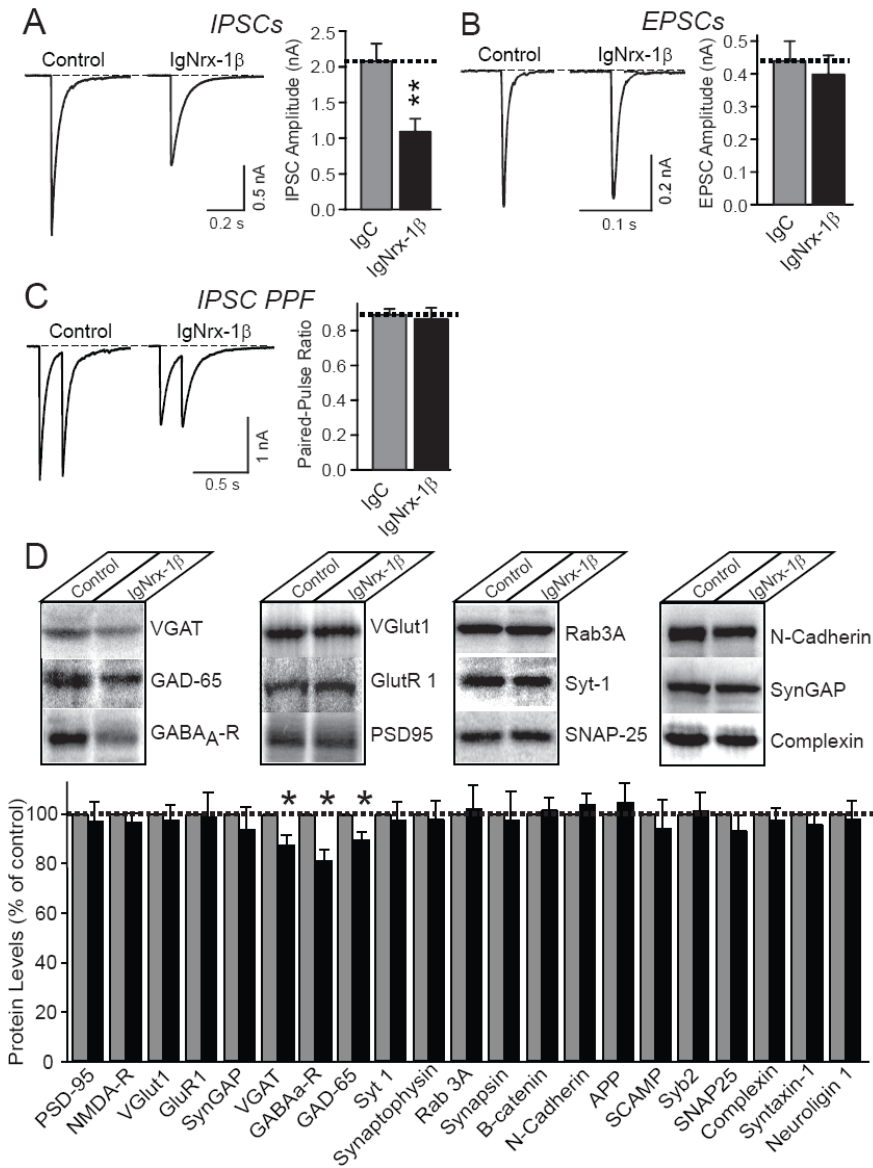

**Figure S5**

**EPSC and IPSC recordings and protein quantitations of hippocampal neurons in culture treated with recombinant Ig-neurexin-1β (IgNrx-1β) or control fusion protein (IgC) (related to Figure 5)**

**A.** Representative traces (left) and mean amplitudes (right) of IPSCs recorded from neurons incubated with IgNrx-1β (1 μM) or IgC (1 μM) for 96 h at 37 °C (IgC: n = 25/3; IgNrx-1β: n = 26/3).

**B.** Representative traces (left) and mean amplitudes (right) of EPSCs recorded from neurons incubated with IgNrx-1β (1 μM) or IgC (1 μM) for 96 h at 37°C (IgC: n = 15/3; IgNrx-1β: n = 15/3).

**C.** Representative traces (left) and paired-pulse ratio (right) of IPSCs evoked by two closely spaced action potentials (200 ms interval)

recorded from neurons incubated with IgC or IgNrx-1β (IgC: n = 12/3; IgNrx-1β: n = 12/3).

**D.** Representative immunoblots (top) and summary graphs (bottom) of protein levels from protein samples collected from hippocampal cultured neurons treated with IgC (1 μM) or IgNrx-1β (1 μM) for 96 h. Protein levels were measured by quantitative immuno-blotting with <sup>125</sup>I-labeled secondary antibodies and phosphorimager detection (n = 4 independent cultures).

All data shown are means ± SEMs. Statistical significance was determined by Student's t test (comparison of IgNrx-1β to IgC; \* = p < 0.05; \*\* = p < 0.01; other comparisons reveal no statistically significant differences).

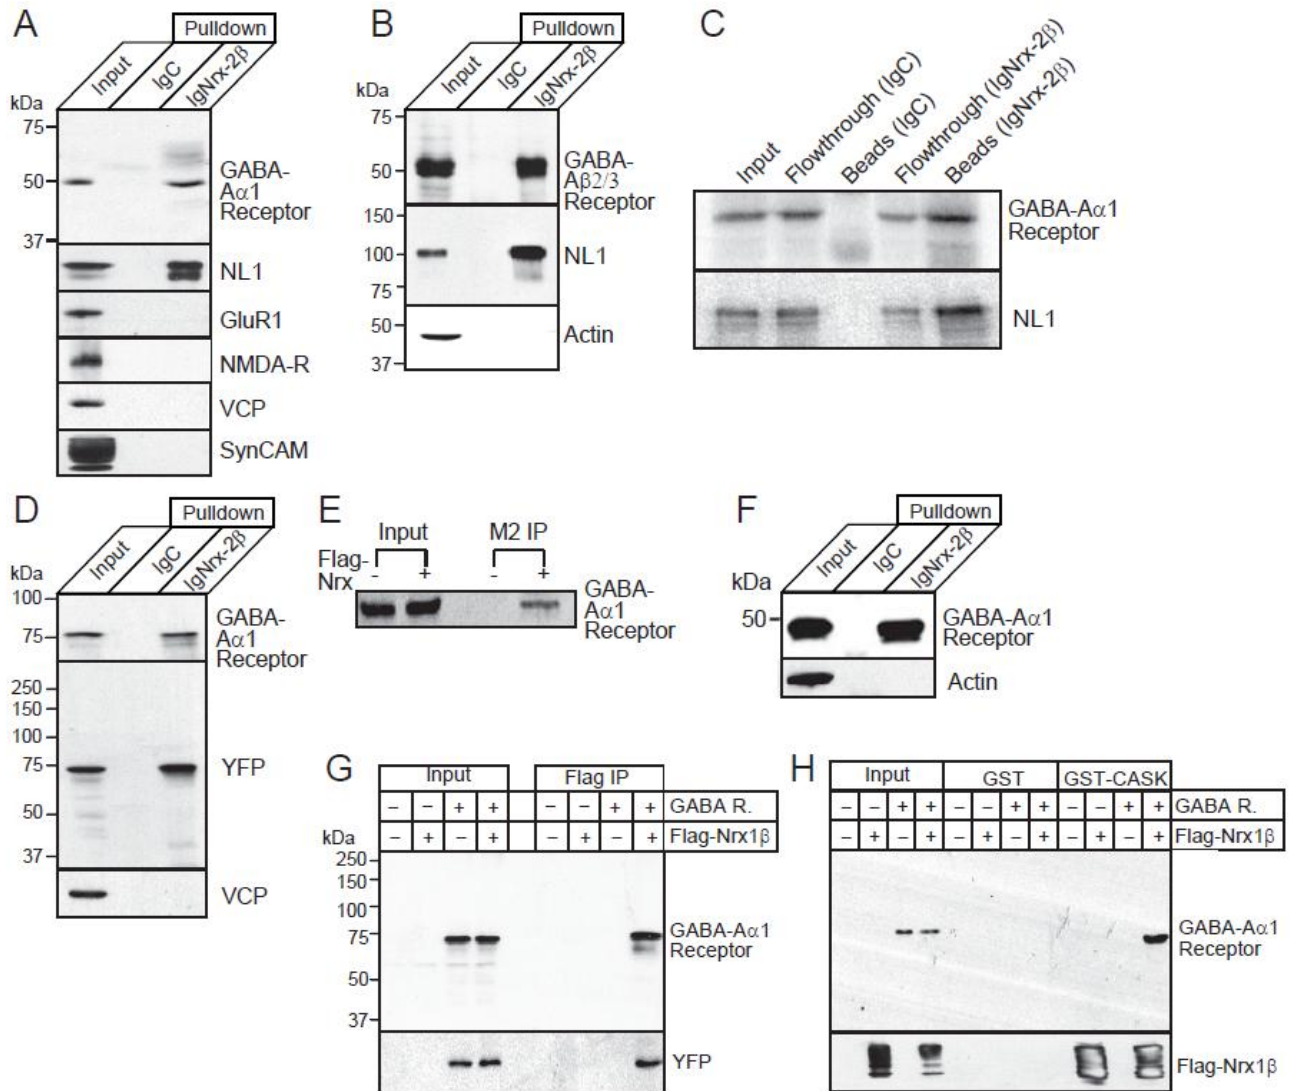

Figure S6

**Miscellaneous affinity chromatography experiments using immobilized Ig- or GST-fusion proteins (related to Figure 6)**

**A and B.** Selective binding of GABA $\alpha$ 1-receptor (A) and GABA $\beta$ 2/3-receptors (B) from rat brain homogenates to immobilized Ig-fusion protein of neurexin-2 $\beta$  (IgNrx-2 $\beta$ ), but not to control Ig-fusion protein (IgC). Rat brain proteins solubilized in Triton X-100 were bound to immobilized Ig-fusion proteins, and bound proteins were analyzed by immunoblotting with antibodies to neuroligin-1 (NL1), glutamate receptor 1 (GluR1), NMDA-receptor (NMDA-R), vasolin-containing protein (VCP), and SynCAM.

**C.** Images of quantitative immunoblotting for the comparative analysis of binding of endogenous GABA $\alpha$ 1 and NL1 in brain homogenates to immobilized Ig-neurexin-2 $\beta$  or IgC control fusion protein (see Fig. 6B). Total rat brain proteins were solubilized in Triton X-100, and bound to IgNrx-2 $\beta$  or IgC in the presence of 2.5 mM Ca $^{2+}$ . The flowthrough was collected, and bound proteins were eluted with SDS-sample buffer. Fractions were



analyzed by immunoblotting for GABA<sub>A</sub>α1-receptor and for neuroligin-1 (NL1) with <sup>125</sup>I-labeled secondary antibodies and PhosphorImager detection.

**D.** Selective binding of YFP-tagged GABA<sub>A</sub>α1 receptor expressed in transfected HEK293 cells to immobilized IgNrx-2β.

**E.** Co-immunoprecipitation with Flag-antibodies of GABA-Aα1 receptor with Flag-tagged neurexin-1β from HEK293 cells stably expressing GABA<sub>A</sub> receptors (α1β2γ2, CRL-2029 from ATCC) transfected with either control or Flag-tagged neurexin-1β.

**F.** Selective binding of GABA<sub>A</sub>α1-receptor from HEK293 cells stably expressing functional surface GABA<sub>A</sub> receptors (CRL-2029 from ATCC) to immobilized Ig-fusion protein of neurexin-2β (IgNrx-2β), but not to control Ig-fusion protein (IgC).

**G.** Co-immunoprecipitation of GABA<sub>A</sub>α1-receptor with neurexin-1β. HEK293 cells were transfected with a control plasmid and/or plasmids encoding YFP-tagged GABA<sub>A</sub>α1-receptor (GABA R.) and/or Flag-tagged neurexin-1β (Flag-Nrx-1β) as indicated, with a constant amount of total transfected DNA. Neurexin-1β was immunoprecipitated from lysates of transfected cells with Flag antibodies, and precipitated proteins were analyzed by immunoblotting with antibodies to GABA<sub>A</sub>α1-receptor or YFP.

**H.** Binding of GABA<sub>A</sub>α1-receptor/neurexin-1β complexes expressed in HEK293 cells transfected as described for A. Cell lysates were affinity-chromatographed on immobilized GST or GST-CASK as described in Fig. 6C, and analyzed by immunoblotting.

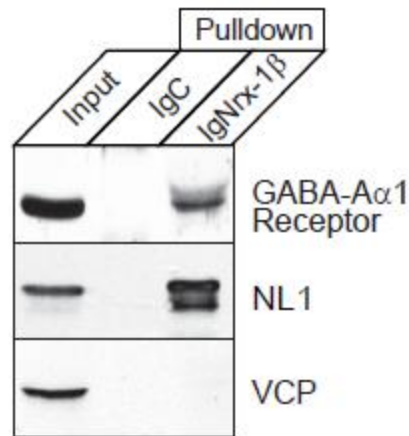

Figure S7

**Affinity chromatography experiments of the binding of endogenous GABA<sub>A</sub> $\alpha$ 1 and NL1 in brain homogenates to immobilized Ig-neurexin-1 $\beta$  or IgC control fusion protein (related to Figure 7)**

Selective binding of GABA<sub>A</sub> $\alpha$ 1-receptor from rat brain homogenates to immobilized Ig-fusion protein of neurexin-1 $\beta$  (IgNrx-1 $\beta$ ), but not to control Ig-fusion protein (IgC). Rat brain proteins solubilized in Triton X-100 were bound to immobilized Ig-fusion proteins, and bound proteins were analyzed by immunoblotting with antibodies to GABA<sub>A</sub> $\alpha$ 1-receptor, neuroligin-1 (NL1) and vasolin-containing protein (VCP). This control experiment ensures that the neurexin-1 $\beta$  used for the measurements of binding affinities in Fig. 7 fully bind to the GABA<sub>A</sub> $\alpha$ 1-receptor.

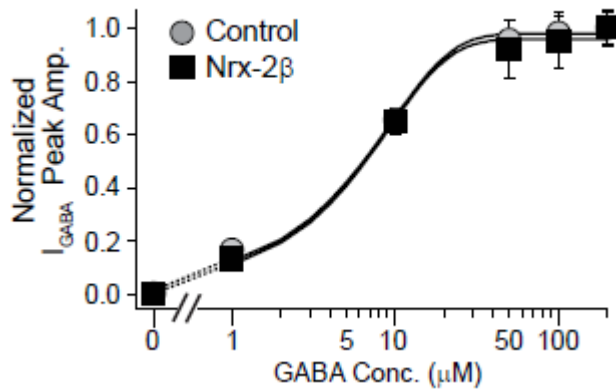

Figure S8

**Lack of changes in apparent GABA-affinity from HEK293 cells stably expressing GABA<sub>A</sub> receptors transfected with either control or Neurexin-2β (related to Figure 8)**

Normalized GABA-induced responses are plotted with GABA concentrations and fitted with Hill relation (control: n = 19/4; Nr-x-2β: n = 17/4). Data are same as in Fig. 8B.

## Supplemental Tables

**Table S1 (related to Figures 1-5)**

Passive membrane parameters (membrane capacitance (Cm), membrane resistance (Rm) and access resistance (Rs) in cultured neurons

|                  | Recombinant protein treatment |                      | Lentiviral Infection  |                       | Calcium-phosphate Transfection |                      |                      |                      |                      |
|------------------|-------------------------------|----------------------|-----------------------|-----------------------|--------------------------------|----------------------|----------------------|----------------------|----------------------|
|                  | IgC                           | IgNrx-1 $\beta$      | Control               | Nrx-2 $\beta$         | Control                        | Nrx-1 $\beta$        | Nrx-2 $\beta$        | Nrx-3 $\beta$        | Nrx-1 $\alpha$       |
| Cm (pF)          | 40 $\pm$ 2<br>(38/3)          | 37 $\pm$ 2<br>(40/3) | 42 $\pm$ 2<br>(86/10) | 38 $\pm$ 2<br>(86/10) | 43 $\pm$ 1<br>(72/4)           | 39 $\pm$ 3<br>(54/4) | 36 $\pm$ 2<br>(86/4) | 40 $\pm$ 4<br>(50/4) | 44 $\pm$ 2<br>(23/2) |
| Rm (M $\Omega$ ) | 362 $\pm$ 30                  | 380 $\pm$ 37         | 389 $\pm$ 31          | 320 $\pm$ 17          | 340 $\pm$ 24                   | 341 $\pm$ 48         | 366 $\pm$ 37         | 335 $\pm$ 40         | 332 $\pm$ 40         |
| Rs (M $\Omega$ ) | 10 $\pm$ 1                    | 9 $\pm$ 1            | 12 $\pm$ 1            | 13 $\pm$ 1            | 11 $\pm$ 1                     | 12 $\pm$ 1           | 12 $\pm$ 1           | 13 $\pm$ 1           | 12 $\pm$ 1           |

Data represent the summary from all electrophysiological experiments. Numerical values are given as means  $\pm$  SEMs. The numbers in the bracket indicate the number of cells analyzed/of independent batches of cultures (applies to all parameters for a given construct).

**Table S2 (related to Figure 6)**

Numerical summary of results of affinity chromatography experiments

| Parameter                        | Transfect with | Infect. with | Value (%<br>mean) | Value (sem.) | n | p-value (p<0.05) | Stat. test | Fig. |
|----------------------------------|----------------|--------------|-------------------|--------------|---|------------------|------------|------|
| Flow-through (GABA-A $\alpha$ 1) |                |              | 88                | 2            | 8 |                  |            | 6B   |
| Flow-through (NL1)               |                |              | 67                | 1            | 8 |                  |            | 6B   |
| Bound (GABA-A $\alpha$ 1)        |                |              | 14                | 2            | 8 |                  |            | 6B   |
| Bound (NL1)                      |                |              | 29                | 2            | 8 |                  |            | 6B   |
| Flow-through (GABA-A $\alpha$ 1) |                |              | 93                | 4            | 6 |                  |            | 6D   |
| Flow through (NL1)               |                |              | 97                | 4            | 6 |                  |            | 6D   |
| Bound (GABA-A $\alpha$ 1)        |                |              | 5.3               | 1.2          | 6 |                  |            | 6D   |
| Bound (NL1)                      |                |              | 4.6               | 0.2          | 6 |                  |            | 6D   |

Data are from figure 6. Bound proteins were analyzed by immunoblotting for GABAA $\alpha$ 1-receptor and neuroligin-1 (NL1) with <sup>125</sup>I-labeled secondary antibodies and phosphoimager detection for quantitation. The percentage of bound protein and unbound protein (Flow through) was calculated by dividing the amount of bound protein and unbound protein (GABA-A $\alpha$ 1 or NL1) by the total amount protein (GABA-A $\alpha$ 1 or NL1) in the input that was used for pulldowns. \*n = number of independent affinity chromatography experiments.

**Table S3 (related to Figures 1-5, 8 and Figures S1-S5 and S8)**

Numerical summary of values obtained in the electrophysiological experiments, as depicted in the main and supplementary figures

| Parameter                        | Transfect with | Infect. with         | Value (mean) | Value (sem.) | n    | p-value (p<0.05) | Stat. test | Fig. |
|----------------------------------|----------------|----------------------|--------------|--------------|------|------------------|------------|------|
| mEPSC freq. (Hz)                 |                | control              | 0.42         | 0.06         | 25/3 |                  |            | 1A   |
| mEPSC freq. (Hz)                 |                | Nrx-2 $\beta$        | 0.50         | 0.09         | 26/3 | p>0.05           | t-test     | 1A   |
| mEPSC amp. (pA)                  |                | control              | 26.85        | 1.11         | 25/3 |                  |            | 1A   |
| mEPSC amp. (pA)                  |                | Nrx-2 $\beta$        | 27.27        | 0.78         | 26/3 | p>0.05           | t-test     | 1A   |
| mIPSC freq. (Hz)                 |                | control              | 0.63         | 0.08         | 29/3 |                  |            | 1B   |
| mIPSC freq. (Hz)                 |                | Nrx-2 $\beta$        | 0.30         | 0.04         | 27/3 | p<0.001          | t-test     | 1B   |
| mIPSC amp. (pA)                  |                | control              | 53.07        | 4.12         | 29/3 |                  |            | 1B   |
| mIPSC amp. (pA)                  |                | Nrx-2 $\beta$        | 51.95        | 5.83         | 27/3 | p>0.05           | t-test     | 1B   |
| eEPSC amp. (pA)                  |                | control              | 459          | 44           | 54/8 |                  |            | 1C   |
| eEPSC amp. (pA)                  |                | Nrx-2 $\beta$        | 398          | 40           | 59/8 | p>0.05           | t-test     | 1C   |
| eEPSC charge (pc)                |                | control              | 3.25         | 0.53         | 54/8 |                  |            | 1C   |
| eEPSC charge (pc)                |                | Nrx-2 $\beta$        | 2.84         | 0.49         | 59/8 | p>0.05           | t-test     | 1C   |
| eIPSC amp. (pA)                  |                | control              | 2764         | 155          | 12/3 |                  |            | 1D   |
| eIPSC amp. (pA)                  |                | Nrx-2 $\beta$        | 1210         | 130          | 13/3 | p<0.001          | t-test     | 1D   |
| eIPSC amp. (pA)                  |                | Ct-Nrx-1 $\beta$     | 2916         | 255          | 15/3 | p>0.05           | t-test     | 1D   |
| eIPSC charge (nc)                |                | control              | 0.28         | 0.04         | 12/3 |                  |            | 1D   |
| eIPSC charge (nc)                |                | Nrx-2 $\beta$        | 0.17         | 0.02         | 13/3 | p<0.01           |            | 1D   |
| eIPSC charge (nc)                |                | Ct-Nrx-1 $\beta$     | 0.31         | 0.04         | 15/3 | p>0.05           |            | 1D   |
| eEPSC amp. (pA)                  |                | control              | 384          | 50           | 11/2 |                  |            | 1E   |
| eEPSC amp. (pA)                  |                | Nrx-2 $\beta$ (-ss4) | 338          | 102          | 11/2 | p>0.05           | t-test     | 1E   |
| eEPSC amp. (pA)                  |                | Nrx-2 $\beta$ (+ss4) | 341          | 32           | 11/2 | p>0.05           | t-test     | 1E   |
| eIPSC amp. (pA)                  |                | control              | 2926         | 357          | 50/8 |                  |            | 1F   |
| eIPSC amp. (pA)                  |                | Nrx-2 $\beta$ (-ss4) | 1496         | 214          | 51/8 | p<0.01           | t-test     | 1F   |
| eIPSC amp. (pA)                  |                | Nrx-2 $\beta$ (+ss4) | 1237         | 230          | 46/8 | p<0.001          | t-test     | 1F   |
| Synapse area ( $\mu\text{m}^2$ ) | control        |                      | 0.91         | 0.1          | 29/3 |                  |            | 1H   |
| Synapse area ( $\mu\text{m}^2$ ) | Nrx-2 $\beta$  |                      | 1.0          | 0.1          | 40/3 | p>0.05           | t-test     | 1H   |

| Parameter                                   | Transfect with          | Infect. with | Value (mean) | Value (sem.) | n    | p-value (p<0.05) | Stat. test | Fig. |
|---------------------------------------------|-------------------------|--------------|--------------|--------------|------|------------------|------------|------|
| Synapse number (per 50 $\mu\text{m}$ )      | control                 |              | 14.1         | 0.7          | 29/3 |                  |            | 1H   |
| Synapse number (per 50 $\mu\text{m}$ )      | Nrx-2 $\beta$           |              | 13.2         | 0.6          | 40/3 | p>0.05           | t-test     | 1H   |
| mIPSC freq. (Hz)                            | control                 |              | 0.22         | 0.04         | 26/3 |                  |            | 2A   |
| mIPSC freq. (Hz)                            | Nrx-2 $\beta$           |              | 0.06         | 0.02         | 24/3 | p<0.01           | t-test     | 2A   |
| mIPSC amp. (pA)                             | control                 |              | 46.31        | 7.36         | 26/3 |                  |            | 2A   |
| mIPSC amp. (pA)                             | Nrx-2 $\beta$           |              | 48.54        | 11.49        | 24/3 | p>0.05           | t-test     | 2A   |
| eIPSC amp. (pA, 1 mM $[\text{Ca}^{2+}]_e$ ) | control                 |              | 489.7        | 80.47        | 17/3 |                  |            | 2D   |
| eIPSC amp. (pA, 2 mM $[\text{Ca}^{2+}]_e$ ) | control                 |              | 1779         | 208.5        | 17/3 |                  |            | 2D   |
| eIPSC amp. (pA, 5 mM $[\text{Ca}^{2+}]_e$ ) | control                 |              | 2498         | 251.1        | 20/3 |                  |            | 2D   |
| eIPSC amp. (pA, 1 mM $[\text{Ca}^{2+}]_e$ ) | Nrx-2 $\beta$           |              | 317.7        | 134.1        | 17/3 | p>0.05           | t-test     | 2D   |
| eIPSC amp. (pA, 2 mM $[\text{Ca}^{2+}]_e$ ) | Nrx-2 $\beta$           |              | 561.1        | 157.1        | 18/3 | p<0.001          | t-test     | 2D   |
| eIPSC amp. (pA, 5 mM $[\text{Ca}^{2+}]_e$ ) | Nrx-2 $\beta$           |              | 896.3        | 246.9        | 23/3 | p<0.001          | t-test     | 2D   |
| eIPSC amp. (pA)                             | control                 |              | 1576.1       | 354.8        | 11/3 |                  |            | 2B   |
| eIPSC amp. (pA)                             | Neigh. To control       |              | 1381.3       | 305.8        | 12/3 | p>0.05           | t-test     | 2B   |
| eIPSC amp. (pA)                             | Neigh. To Nrx-2 $\beta$ |              | 1316.4       | 173.1        | 11/3 |                  |            | 2B   |
| eIPSC amp. (pA)                             | Nrx-2 $\beta$           |              | 440.9        | 67.0         | 12/3 | p<0.001          | t-test     | 2B   |
| eIPSC ratio                                 | control                 |              | 0.932        | 0.041        | 11/3 |                  |            | 2B   |
| eIPSC ratio                                 | Nrx-2 $\beta$           |              | 0.328        | 0.038        | 12/3 | p<0.001          | t-test     | 2B   |
| eEPSC amp. (pA)                             | control                 |              | 434.7        | 82.48        | 28/4 |                  |            | 2E   |
| eEPSC amp. (pA)                             | Nrx-2 $\beta$           |              | 391.3        | 60.71        | 32/4 | p>0.05           | t-test     | 2E   |
| eEPSC charge. (pC)                          | control                 |              | 3.90         | 0.73         | 28/4 |                  |            | 2E   |
| eEPSC charge. (pC)                          | Nrx-2 $\beta$           |              | 3.34         | 0.63         | 32/4 | p>0.05           | t-test     | 2E   |
| Sucrose (IPSC, nC)                          | control                 |              | 10.45        | 1.20         | 36/8 |                  |            | 2F   |
| Sucrose (IPSC, nc)                          | Nrx-2 $\beta$           |              | 6.51         | 0.99         | 42/8 | p<0.05           | t-test     | 2F   |
| NL1 Fluro. Inten. (A.U)                     | control                 |              | 100          | 3.34135      | 55/4 |                  |            | 2G   |
| NL1 Fluro. Inten. (A.U)                     | Nrx-2 $\beta$           |              | 104.533      | 4.31267      | 62/4 | p>0.05           | t-test     | 2G   |
| Syt1 Fluro. Inten. (A.U)                    | control                 |              | 100          | 1.62489      | 55/4 |                  |            | 2G   |
| Syt1 Fluro. Inten. (A.U)                    | Nrx-2 $\beta$           |              | 104.148      | 2.59603      | 62/4 | p>0.05           | t-test     | 2G   |
| GABA $\alpha$ 1 Fluro. Inten. (A.U)         | control                 |              | 100          | 3.24765      | 52/4 |                  |            | 2G   |

| Parameter                           | Transfect with                           | Ig-Nrx | Value (mean) | Value (sem.) | n    | p-value (p<0.05) | Stat. test | Fig. |
|-------------------------------------|------------------------------------------|--------|--------------|--------------|------|------------------|------------|------|
| GABA $\alpha$ 1 Fluro. Inten. (A.U) | Nrx-2 $\beta$                            |        | 81.1016      | 2.55337      | 69/4 | p<0.001          | t-test     | 2G   |
| GAD65 Fluro. Inten. (A.U)           | control                                  |        | 100          | 1.2493       | 52/4 |                  |            | 2G   |
| GAD65 Fluro. Inten. (A.U)           | Nrx-2 $\beta$                            |        | 91.3215      | 2.18088      | 69/4 | p<0.01           | t-test     | 2G   |
| eEPSC amp. (pA)                     | control                                  |        | 523.9        | 100          | 30/4 |                  |            | 3A   |
| eEPSC amp. (pA)                     | Nrx-1 $\beta$                            |        | 419.5        | 70.61        | 31/4 | p>0.05           | t-test     | 3A   |
| eEPSC amp. (pA)                     | Nrx-2 $\beta$                            |        | 332.2        | 65.45        | 28/4 | p>0.05           | t-test     | 3A   |
| eEPSC amp. (pA)                     | Nrx-3 $\beta$                            |        | 472.9        | 84.45        | 29/4 | p>0.05           | t-test     | 3A   |
| eIPSC amp. (pA)                     | control                                  |        | 2093         | 213.7        | 42/4 |                  |            | 3A   |
| eIPSC amp. (pA)                     | Nrx-1 $\beta$                            |        | 900.1        | 167.8        | 23/3 | p<0.001          | t-test     | 3A   |
| eIPSC amp. (pA)                     | Nrx-2 $\beta$                            |        | 555.6        | 120.7        | 48/4 | p<0.001          | t-test     | 3A   |
| eIPSC amp. (pA)                     | Nrx-3 $\beta$                            |        | 913.3        | 156.2        | 21/3 | p<0.001          | t-test     | 3A   |
| eIPSC amp. (pA)                     | control                                  |        | 1724         | 523.9        | 32/5 |                  |            | 3B   |
| eIPSC amp. (pA)                     | Nrx-2 $\beta$                            |        | 472.8        | 419.5        | 52/5 | p<0.001          | t-test     | 3B   |
| eIPSC amp. (pA)                     | Nrx-2 $\beta$ <sup>Act</sup> without SS4 |        | 437.6        | 332.2        | 32/5 | p<0.001          | t-test     | 3B   |
| eIPSC amp. (pA)                     | Nrx-2 $\beta$ <sup>Act</sup> with SS4    |        | 437.6        | 472.9        | 24/4 | p<0.001          | t-test     | 3B   |
| eIPSC amp. (pA)                     | Ct-Nrx-1 $\beta$                         |        | 2032         | 523.9        | 42/3 | p<0.001          | t-test     | 3B   |
| eIPSC amp. (pA)                     | Control (24h)                            |        | 1304         | 121.1        | 15/3 |                  |            | 3C   |
| eIPSC amp. (pA)                     | Nrx-2 $\beta$ (24h)                      |        | 1341         | 172.45       | 15/3 | p>0.05           | t-test     | 3C   |
| eIPSC amp. (pA)                     | Control (48h)                            |        | 1999         | 153.1        | 15/3 |                  |            | 3C   |
| eIPSC amp. (pA)                     | Nrx-2 $\beta$ (48h)                      |        | 1336         | 131.85       | 15/3 | p<0.05           | t-test     | 3C   |
| eIPSC amp. (pA)                     | Control (72h)                            |        | 2199         | 207.2        | 15/3 |                  |            | 3C   |
| eIPSC amp. (pA)                     | Nrx-2 $\beta$ (72h)                      |        | 1129         | 133.35       | 15/3 | p<0.01           | t-test     | 3C   |
| eIPSC amp. (pA)                     | Control (96h)                            |        | 2351         | 174.95       | 15/3 |                  |            | 3C   |
| eIPSC amp. (pA)                     | Nrx-2 $\beta$ (96h)                      |        | 915.7        | 124.85       | 15/3 | p<0.001          | t-test     | 3C   |
| mIPSC freq. (Hz)                    | Control                                  |        | 0.5453       | 0.08065      | 15/3 |                  |            | S4C  |
| mIPSC freq. (Hz)                    | Nrx TKD                                  |        | 0.5375       | 0.07897      | 15/3 | p>0.05           | t-test     | S4C  |
| eIPSC amp. (pA)                     | Control                                  |        | 2883         | 441.8        | 16/3 |                  |            | S4D  |
| eIPSC amp. (pA)                     | Nrx TKD                                  |        | 2954         | 364          | 16/3 | p>0.05           | t-test     | S4D  |
| eIPSC amp. (pA)                     | control                                  |        | 1832         | 218          | 42/5 |                  |            | 4A   |
| eIPSC amp. (pA)                     | Nrx-1 $\beta$                            |        | 1231         | 203          | 55/5 |                  |            | 4A   |
| eIPSC amp. (pA)                     | NL-2                                     |        | 3124         | 338          | 9/1  |                  |            | 4A   |
| eIPSC amp. (pA)                     | Nrx-1 $\beta$ + NL-2                     |        | 2083         | 347          | 25/4 |                  |            | 4A   |
| eIPSC amp. (pA)                     | Nrx-1 $\beta$ + NL-1                     |        | 1251         | 297          | 26/4 |                  |            | 4A   |
| eIPSC amp. (pA)                     | control                                  |        | 2354         | 168          | 48/5 |                  |            | 4B   |



| Parameter          | Transfect with                 | Ig-Nrx                         | Value (mean) | Value (sem.) | n    | p-value (p<0.05) | Stat. test | Fig. |
|--------------------|--------------------------------|--------------------------------|--------------|--------------|------|------------------|------------|------|
| eIPSC amp. (pA)    | Nrx-1 $\alpha$                 |                                | 1491         | 92           | 38/5 |                  |            | 4B   |
| eIPSC amp. (pA)    | Nrx-1 $\alpha$ + NL-2          |                                | 2378         | 331          | 16/3 |                  |            | 4B   |
| eIPSC amp. (pA)    | Nrx-1 $\alpha$ + NL-1          |                                | 1537         | 251          | 19/3 |                  |            | 4B   |
| eIPSC amp. (pA)    | control                        |                                | 1883         | 137          | 20/3 |                  |            | 4C   |
| eIPSC amp. (pA)    | Nrx-2 $\beta$                  |                                | 1047         | 135          | 19/3 | p<0.001          | t-test     | 4C   |
| eIPSC amp. (pA)    | control                        |                                | 1979         | 107          | 9/3  |                  |            | 4D   |
| eIPSC amp. (pA)    | Nrx-2 $\beta$                  |                                | 1224         | 114          | 9/3  | p<0.05           | t-test     | 4D   |
| eIPSC amp. (pA)    | control                        |                                | 1715         | 295          | 15/3 |                  |            | 4E   |
| eIPSC amp. (pA)    | Nrx-2 $\beta$ <sup>D137A</sup> |                                | 897          | 233          | 15/3 | p<0.05           | t-test     | 4E   |
| eIPSC amp. (pA)    | control                        |                                | 2620         | 417.35       | 16/3 |                  |            | 4F   |
| eIPSC amp. (pA)    | Nrx-2 $\beta$                  |                                | 851.4        | 141.8        | 11/3 | p<0.01           | t-test     | 4F   |
| eIPSC amp. (pA)    | Nrx-2 $\beta$ + DG             |                                | 790.3        | 411.3        | 16/3 | p<0.01           | t-test     | 4F   |
| eIPSC amp. (pA)    | DG                             |                                | 2644         | 468          | 12/2 | p>0.05           | t-test     | 4F   |
| eIPSC amp. (pA)    | control                        |                                | 2106         | 318.7        | 14/3 |                  |            | 4H   |
| eIPSC amp. (pA)    | Nrx-2 $\beta$ <sup>KDEL</sup>  |                                | 2295         | 358.3        | 13/3 | p>0.05           | t-test     | 4H   |
| eIPSC amp. (pA)    | control                        |                                | 2506         | 514.1        | 8/3  |                  |            | 4H   |
| eIPSC amp. (pA)    | Nrx-2 $\beta$                  |                                | 1162         | 112.1        | 8/3  | p<0.01           | t-test     | 4H   |
| mIPSC freq. (Hz)   |                                | Ig-C                           | 0.57         | 0.08         | 19/3 |                  |            | 5A   |
| mIPSC freq. (Hz)   |                                | IgNrx-1 $\beta$                | 0.30         | 0.07         | 19/3 | p<0.01           | t-test     | 5A   |
| mIPSC amp. (pA)    |                                | Ig-C                           | 42.34        | 9.510        | 19/3 |                  |            | 5A   |
| mIPSC amp. (pA)    |                                | IgNrx-1 $\beta$                | 44.86        | 8.948        | 19/3 | p>0.05           | t-test     | 5A   |
| eIPSC amp. (pA)    |                                | Ig-C                           | 3118         | 242          | 17/3 |                  |            | 5B   |
| eIPSC amp. (pA)    |                                | IgNrx-1 $\beta$ (0.05 $\mu$ M) | 2835         | 538          | 7/3  | p>0.005          |            | 5B   |
| eIPSC amp. (pA)    |                                | IgNrx-1 $\beta$ (0.1 $\mu$ M)  | 2650         | 340          | 7/3  | p>0.005          |            | 5B   |
| eIPSC amp. (pA)    |                                | IgNrx-1 $\beta$ (0.5 $\mu$ M)  | 1817         | 332          | 13/3 | p<0.005          |            | 5B   |
| eIPSC amp. (pA)    |                                | IgNrx-1 $\beta$ (1 $\mu$ M)    | 1703         | 169          | 12/3 | p<0.001          |            | 5B   |
| Sucrose (IPSC, nC) |                                | Ig-C                           | 7.1          | 0.8          | 14/3 |                  |            | 5C   |
| Sucrose (IPSC, nc) |                                | IgNrx-1 $\beta$                | 4.2          | 0.7          | 15/3 | p<0.01           | t-test     | 5C   |
| eIPSC amp. (pA)    |                                | Ig-C (24h)                     | 3258         | 209.6        | 19/3 |                  |            | 5D   |
| eIPSC amp. (pA)    |                                | Ig-C (48h)                     | 3393         | 275.1        | 14/3 |                  |            | 5D   |
| eIPSC amp. (pA)    |                                | Ig-C (72h)                     | 3378         | 191.5        | 19/3 |                  |            | 5D   |
| eIPSC amp. (pA)    |                                | Ig-C (96h)                     | 3230         | 230.7        | 14/3 |                  |            | 5D   |

| Parameter                   | Transfect with                   | Ig-Nrx                | Value (mean) | Value (sem.) | n    | p-value (p<0.05) | Stat. test | Fig. |
|-----------------------------|----------------------------------|-----------------------|--------------|--------------|------|------------------|------------|------|
| eIPSC amp. (pA)             |                                  | IgNrx-1 $\beta$ (24h) | 3123         | 210.8        | 14/3 | p>0.05           | t-test     | 5D   |
| eIPSC amp. (pA)             |                                  | IgNrx-1 $\beta$ (48h) | 2901         | 197.8        | 15/3 | p>0.05           | t-test     | 5D   |
| eIPSC amp. (pA)             |                                  | IgNrx-1 $\beta$ (72h) | 2548         | 155.4        | 19/3 | p<0.05           | t-test     | 5D   |
| eIPSC amp. (pA)             |                                  | IgNrx-1 $\beta$ (96h) | 2090         | 129.95       | 15/3 | p<0.01           | t-test     | 5D   |
| eIPSC amp. (pA)             |                                  | Ig-C (24h)            | 1382         | 180.7        | 24/4 |                  |            | 5E   |
| eIPSC amp. (pA)             |                                  | Ig-C (48h)            | 1904         | 329.2        | 18/3 |                  |            | 5E   |
| eIPSC amp. (pA)             |                                  | Ig-C (72h)            | 2253         | 269.3        | 18/3 |                  |            | 5E   |
| eIPSC amp. (pA)             |                                  | Ig-C (96h)            | 2991         | 269.6        | 18/3 |                  |            | 5E   |
| eIPSC amp. (pA)             |                                  | IgNrx-1 $\beta$ (24h) | 1479         | 136.2        | 26/4 | p>0.05           | t-test     | 5E   |
| eIPSC amp. (pA)             |                                  | IgNrx-1 $\beta$ (48h) | 1402         | 232.4        | 18/3 | p>0.05           | t-test     | 5E   |
| eIPSC amp. (pA)             |                                  | IgNrx-1 $\beta$ (72h) | 1495         | 145          | 22/3 | p<0.05           | t-test     | 5E   |
| eIPSC amp. (pA)             |                                  | IgNrx-1 $\beta$ (96h) | 1618         | 201.8        | 18/3 | p<0.01           | t-test     | 5E   |
| I <sub>GABA</sub> amp. (pA) | control                          |                       | 1803         | 110.5        | 18/3 |                  |            | 8A   |
| I <sub>GABA</sub> amp. (pA) | Nrx-2 $\beta$                    |                       | 873.7        | 82.71        | 18/3 | p<0.01           | t-test     | 8A   |
| I <sub>GABA</sub> amp. (pA) | control (1 $\mu$ M GABA)         |                       | 305.67       | 27.0196      | 19/4 |                  |            | 8B   |
| I <sub>GABA</sub> amp. (pA) | control (5 $\mu$ M GABA)         |                       | 1182.81      | 69.1361      | 19/4 |                  |            | 8B   |
| I <sub>GABA</sub> amp. (pA) | control (10 $\mu$ M GABA)        |                       | 1723.4       | 121.414      | 19/4 |                  |            | 8B   |
| I <sub>GABA</sub> amp. (pA) | control (100 $\mu$ M GABA)       |                       | 1770.66      | 98.135       | 19/4 |                  |            | 8B   |
| I <sub>GABA</sub> amp. (pA) | control (200 $\mu$ M GABA)       |                       | 1803         | 110.5        | 19/4 |                  |            | 8B   |
| I <sub>GABA</sub> amp. (pA) | Nrx-2 $\beta$ (1 $\mu$ M GABA)   |                       | 119.83       | 32.5226      | 17/4 | p<0.05           | t-test     | 8B   |
| I <sub>GABA</sub> amp. (pA) | Nrx-2 $\beta$ (5 $\mu$ M GABA)   |                       | 567.705      | 69.4617      | 17/4 | p<0.01           | t-test     | 8B   |
| I <sub>GABA</sub> amp. (pA) | Nrx-2 $\beta$ (10 $\mu$ M GABA)  |                       | 803.252      | 153.249      | 17/4 | p<0.05           | t-test     | 8B   |
| I <sub>GABA</sub> amp. (pA) | Nrx-2 $\beta$ (100 $\mu$ M GABA) |                       | 832.695      | 145.69       | 17/4 | p<0.05           | t-test     | 8B   |

| Parameter                       | Transfect with      | Ig-Nrx   | Value (mean) | Value (sem.) | n    | p-value (p<0.05) | Stat. test | Fig. |
|---------------------------------|---------------------|----------|--------------|--------------|------|------------------|------------|------|
| I <sub>GABA</sub> amp. (pA)     | Nrx-2β (200μM GABA) |          | 873.7        | 82.71        | 17/4 | p<0.01           | t-test     | 8B   |
| I <sub>GABA</sub> amp. (pA)     |                     | Ig-C     | 2349.33      | 180.667      | 15/3 |                  |            | 8C   |
| I <sub>GABA</sub> amp. (pA)     |                     | IgNrx-2β | 1612         | 191          | 16/3 | p<0.05           | t-test     | 8C   |
| GABAA-α1 levels                 | control             |          | 100          | 0            | 13   |                  |            | 8D   |
| GABAA-α1 levels                 | Nrx-2β              |          | 78           | 7            | 13   | p<0.05           | t-test     | 8D   |
| mRNA level (GAD65)              | Nrx-2β              |          | 88           | 25           | 3    | p>0.05           | t-test     | S1C  |
| mRNA level (VGAT)               | Nrx-2β              |          | 75           | 24           | 3    | p>0.05           | t-test     | S1C  |
| mRNA level (GABAA-α1)           | Nrx-2β              |          | 96           | 22           | 3    | p>0.05           | t-test     | S1C  |
| Synapse area (μm <sup>2</sup> ) | Control             |          | 0.80         | 0.01         | 62/4 |                  |            | S2C  |
| Synapse area (μm <sup>2</sup> ) | Nrx-2β              |          | 0.82         | 0.01         | 62/4 | p>0.05           | t-test     | S2C  |
| Synapse number (per 50 μm)      | Control             |          | 14.3         | 0.8          | 62/4 |                  |            | S2C  |
| Synapse number (per 50 μm)      | Nrx-2β              |          | 12.1         | 0.8          | 62/4 | p>0.05           | t-test     | S2C  |
| Synapse area (μm <sup>2</sup> ) | Control             |          | 0.76         | 0.01         | 64/4 |                  |            | S2E  |
| Synapse area (μm <sup>2</sup> ) | Nrx-2β              |          | 0.77         | 0.01         | 64/4 | p>0.05           | t-test     | S2E  |
| Synapse number (per 50 μm)      | Control             |          | 17.8         | 0.7          | 64/4 |                  |            | S2E  |
| Synapse number (per 50 μm)      | Nrx-2β              |          | 16.0         | 0.7          | 64/4 | p>0.05           | t-test     | S2E  |
| mIPSC amp. (pA)                 | Control             |          | 27.11        | 2.409        | 15/3 |                  |            | S4C  |
| mIPSC amp. (pA)                 | Nrx TKD             |          | 33.62        | 2.541        | 15/3 | p>0.05           | t-test     | S4C  |
| eIPSC amp. (pA)                 | control             |          | 2486         | 428          | 9/3  |                  |            | S3   |
| eIPSC amp. (pA)                 | Nrx-2β              |          | 880          | 199          | 10/3 | p<0.01           | t-test     | S3   |
| eIPSC amp. (pA, +CNQX)          | control             |          | 2327         | 210          | 14/3 |                  |            | S3   |
| eIPSC amp. (pA, +CNQX)          | Nrx-2β              |          | 867          | 107          | 14/3 | p<0.01           | t-test     | S3   |
| eIPSC amp. (pA, +APV)           | control             |          | 2447         | 293          | 21/3 |                  |            | S3   |
| eIPSC amp. (pA, +APV)           | Nrx-2β              |          | 687          | 188          | 24/3 | p<0.001          | t-test     | S3   |
| eIPSC amp. (pA, +PTX)           | control             |          | 1956         | 332          | 12/3 |                  |            | S3   |
| eIPSC amp. (pA, +PTX)           | Nrx-2β              |          | 947          | 167          | 14/3 | p<0.05           | t-test     | S3   |
| eIPSC amp. (pA, +CNQX+APV+PTX)  | control             |          | 2345         | 401          | 18/3 |                  |            | S3   |

| Parameter                       | Transfect with                  | Ig-Nrx          | Value (mean) | Value (sem.) | n    | p-value (p<0.05) | Stat. test | Fig. |
|---------------------------------|---------------------------------|-----------------|--------------|--------------|------|------------------|------------|------|
| eIPSC amp. (pA, +CNQX+APV+P TX) | Nrx-2 $\beta$                   |                 | 1004         | 240          | 15/3 | p<0.05           | t-test     | S3   |
| eIPSC amp. (pA, +TTX)           | control                         |                 | 1797         | 412          | 12/3 |                  |            | S3   |
| eIPSC amp. (pA, +TTX)           | Nrx-2 $\beta$                   |                 | 408          | 69           | 15/3 | p<0.01           | t-test     | S3   |
| eIPSC amp. (pA, control)        |                                 |                 | 1894         | 257          | 7/2  |                  |            | S4A  |
| eIPSC amp. (pA, NL-2 KO)        |                                 |                 | 1784         | 336          | 7/2  | p>0.05           | t-test     | S4A  |
| eIPSC amp. (pA)                 |                                 | Ig-C            | 2099         | 239.2        | 25/3 |                  |            | S5C  |
| eIPSC amp. (pA)                 |                                 | IgNrx-1 $\beta$ | 1106         | 166.2        | 26/3 | p<0.01           | t-test     | S5C  |
| eEPSC amp. (pA)                 |                                 | Ig-C            | 448.2        | 59.16        | 15/3 |                  | t-test     | S5D  |
| eEPSC amp. (pA)                 |                                 | IgNrx-1 $\beta$ | 406.2        | 57.46        | 15/3 | p>0.05           | t-test     | S5D  |
| Paired-pulse ratio              |                                 | Ig-C            | 0.89         | 0.03         | 12/3 |                  | t-test     | S5E  |
| Paired-pulse ratio              |                                 | IgNrx-1 $\beta$ | 0.87         | 0.06         | 12/3 | p>0.05           | t-test     | S5E  |
| Normalized I <sub>GABA</sub>    | control (1 $\mu$ M GABA)        |                 | 0.17         | 0.01         |      |                  |            | S8   |
| Normalized I <sub>GABA</sub>    | control (5 $\mu$ M GABA)        |                 | 0.66         | 0.04         |      |                  |            | S8   |
| Normalized I <sub>GABA</sub>    | control (10 $\mu$ M GABA)       |                 | 0.96         | 0.07         |      |                  |            | S8   |
| Normalized I <sub>GABA</sub>    | control (100 $\mu$ M GABA)      |                 | 0.98         | 0.05         |      |                  |            | S8   |
| Normalized I <sub>GABA</sub>    | control (200 $\mu$ M GABA)      |                 | 1            | 0.04         |      |                  |            | S8   |
| Normalized I <sub>GABA</sub>    | Nrx-2 $\beta$ (1 $\mu$ M GABA)  |                 | 0.14         | 0.02         |      |                  |            | S8   |
| Normalized I <sub>GABA</sub>    | Nrx-2 $\beta$ (5 $\mu$ M GABA)  |                 | 0.65         | 0.05         |      |                  |            | S8   |
| Normalized I <sub>GABA</sub>    | Nrx-2 $\beta$ (10 $\mu$ M GABA) |                 | 0.92         | 0.11         |      |                  |            | S8   |

**Table S4 (related to all Figures)**

Summary of constructs/expressed proteins used in this study.

| Name                                                     | Starting from...<br>(residue)                                     | Ending at...<br>(residue) | Species           | Notes                                                                                                   |
|----------------------------------------------------------|-------------------------------------------------------------------|---------------------------|-------------------|---------------------------------------------------------------------------------------------------------|
| Nrx-2 $\beta$<br>(lentiviral and<br>pCMV5<br>version)    | MPPGGSGQGG...                                                     | ...KKNKDKEYYV.            | Rattus<br>norveg. |                                                                                                         |
| Ct-Nrx-1 $\beta$<br>(lentiviral and<br>pCMV5<br>version) | Nrx 1 $\beta$ Signal peptide<br>seq.+EVIRESSST...                 | ...KKNKDKEYYV.            | Rattus<br>norveg. |                                                                                                         |
| Nrx-2 $\beta^{\Delta Ct}$                                | MPPGGSGQGG...                                                     | ...LYAMYKYRNR.            | Rattus<br>norveg. |                                                                                                         |
| Nrx-2 $\beta^{D137A}$                                    | MPPGGSGQGG...                                                     | ...KKNKDKEYYV.            | Rattus<br>norveg. | Oligo (CZs0829): TCGGGG<br>CAACCTGCAGCTGCACA<br>TT<br>Oligo (CZs0829):<br>AATGTGCAGCTGCAGGT<br>ATGCCCGA |
| Nrx-1 $\beta$                                            | MYQRMLRCGA...                                                     | ...KKNKDKEYYV.            | Rattus<br>norveg. |                                                                                                         |
| Flag-Nrx1 $\beta$                                        | MSALLILALVGAAVA<br>DYKDDDDKLA AA +<br>Nrx1 $\beta$ mature protein | ...KKNKDKEYYV.            | Rattus<br>norveg. |                                                                                                         |
| Nrx-3 $\beta$                                            | MHLRIHARRN...                                                     | ...QKNKDKEYYV.            | Bos taurus        |                                                                                                         |
| IgNrx-1 $\beta$                                          | MLRCGAELGSPG...                                                   | ...LVGEVPSSMTT<br>E+Ig    | Bos taurus        |                                                                                                         |
| IgNrx-2 $\beta$                                          | MPPGGSGQGG...                                                     | ...GAVEVIRESS+I<br>g      | Rattus<br>norveg. |                                                                                                         |
| IgNrx-2 $\beta^{D137A}$                                  | MPPGGSGQGG...                                                     | ...GAVEVIRESS+I<br>g      | Rattus<br>norveg. | Oligo (CZs0829):<br>TCGGGGCATACCTGCAG<br>CTGCACATT<br>Oligo (CZs0829):<br>AATGTGCAGCTGCAGGT<br>ATGCCCGA |
| GST-CASK                                                 | GST+DFSEDPTSSGL<br>...                                            | ...QWVPVSWVY.             | Rattus<br>norveg. | aa. (328-909)                                                                                           |
| YFP-tagged<br>GABA-A $\alpha$ 1<br>Receptor              | MRKSPGLSDC...                                                     | ...PQLKAPTPHQ.            | Homo<br>sapiens   | Full length; gift from Dr.<br>Robert L. Macdonald<br>(Vanderbilt University)                            |
| GST-GABA-<br>A $\alpha$ 1                                | GST+QPSLQDELKD<br>...                                             | ...THFHLKRKIG+H<br>A.     | Homo<br>sapiens   | aa. (28-251)                                                                                            |
| GABA-A $\alpha$ 1<br>Receptor N-<br>term.                | QPSLQDELKD...                                                     | ...THFHLKRKIG             | Homo<br>sapiens   | aa. (28-251)                                                                                            |
| Nrx1 $\beta$ LNS                                         | ASSLGAHHIHH...                                                    | EVPSSMTTES                | Rattus            | aa. (47-299)                                                                                            |

|                               |                  |                              |                      |  |
|-------------------------------|------------------|------------------------------|----------------------|--|
| Domain                        |                  |                              | norvegicus           |  |
| NL1                           | MALPRCMWPNYV...  | ...PHPHPHSHSTT<br>RV.        | Rattus<br>norvegicus |  |
| NL2                           | MWLLALCLVGLAG... | ...NNTLPHPHSTT<br>RV.        | Rattus<br>norvegicus |  |
| Nrx-2 $\beta$ <sup>KDEL</sup> | MPPGGSGQGG...    | ...RESSSTEQKLIS<br>EEDLKDEL. | Rattus<br>norvegicus |  |

## Supplemental Experimental Procedures

**Construction of Expression Vectors.** Full-length cDNA for Neurexin-1 $\alpha$  and -1 $\beta$ , -2 $\beta$ , and -3 $\beta$  (Sugita et al., 2001; Ushkaryov et al., 1994) were employed for this study (all in a pCMV5 backbone). FLAG tag (DYKDDDDK) was fused to neurexin-1 $\beta$  right after the signal peptide, and the original signal peptide was replaced with a trypsin signal peptide (sequence of N-terminus including Flag-tag: MSALLILALVGAAVADYKDDDDKLA $\alpha\alpha$ ). Nr $\alpha$ -2 $\beta^{\Delta\text{Ct}}$  encodes the extracellular sequences, transmembrane region, and 7 residues of the cytoplasmic tail of neurexin-2 $\beta$  (ending with: MYKYRNR-Stop). Nr $\alpha$ -2 $\beta^{\text{KDEL}}$  encodes the extracellular sequences (ends at ...RESSST) following myc-tag (EQKLISEEDL) and KDEL sequence (KDEL-Stop). Ct-Nr $\alpha$ -1 $\beta$  encodes the original neurexin signal peptide fused to the last 10 residues of the extracellular neurexin-2 sequence (starting with EVIRESSST), the transmembrane region, and the cytoplasmic tail of neurexin-1 $\beta$ . Constructs expressing neuroligin-1 and -2 (Chubykin et al., 2007), Ig-fused neurexin-1 $\beta$  (Boucard et al., 2005) and GST-CASK (Mukherjee et al., 2008) were described before. The vector encoding YFP-tagged GABA $\alpha$ 1-receptor was a gift from Robert Macdonald (Gallagher et al., 2005). Ig-fused neurexin-2 $\beta$  was made similar to Ig-fused neurexin-1 $\beta$  (residues 1-359 of rat neurexin-2 $\beta$  fused to the human IgG Fc fragment; Ushkaryov et al., 1994). The lentiviral constructs used in this paper were based on the pFUGW backbone vector (Lois et al., 2002), and generated as described (Maximov and Sudhof, 2005). To allow visualization of infected neurons using fluorescent microscopy, IRES-EGFP was inserted into the pFUGW backbone, and used as control vector in lentiviral experiments. Full-length neurexin-2 $\beta$  cDNA (with or without an insert in splice site 4) was inserted into the BamHI site of pFUGW vector. Neurexin knockdown constructs were based on the lentiviral backbone vector described previously (Maximov et al., 2009). The expression of shRNA was driven by human H1 promoter, which is upstream of the ubiquitin (Ub) promoter driving EGFP expression in the lentiviral shuttle vector.

**Production of recombinant Ig-fused neurexins.** Recombinant Ig-fusion proteins were produced as essentially described (Boucard et al., 2005). Briefly, COS cells were transfected with the Ig constructs using FUGENE 6 (Roche Applied Science), and the media of transfected COS cells were harvested 3-4 d after transfection and cleared by centrifugation at 2,500 g. The supernatants were then adjusted to 10 mM HEPES-NaOH

pH 7.4, 1 mM EDTA, 1 mM PMSF, 1 mg/l pepstatin, 1 mg/l leupeptin and 2 mg/l aprotinin, incubated overnight at 4 °C with protein A-Sepharose (Amersham Pharmacia Biotech), and washed three times with cold PBS before use in affinity chromatography experiments. Soluble Ig-proteins were obtained by elution from protein A-Sepharose beads with 0.02 M glycine pH 2.2 for 5 min on ice, followed by equilibration with 15 ml 50 mM HEPES-NaOH pH 7.5. The collected soluble proteins were concentrated to 500 µl using a centriprep concentrator (Millipore, UFC901024, 10 Kda cut-off), and then washed with PBS six times to reduce the amount of glycine in the final elution. The concentration of eluted recombinant protein was quantified using Coomassie Blue staining, and the protein solution was diluted to 1 µM using neuronal medium or HEK293 culture medium, then filtered with 0.22 µm syringe filter before applying to neuronal culture or HEK293 cells.

**Affinity Chromatography.** For brain affinity chromatography experiment, one rat brain was homogenized with 6-8 strokes in 10 ml of PBS, 0.1 mM EGTA, 1 mM PMSF, 1 µg/ml pepstatin, 1 µg/ml leupeptin and 2 µg/ml protinin, and adjusted to 1% Triton X-100 final concentration. Proteins in the homogenate were extracted for 2 h at 4 °C, insoluble material was removed by centrifugation (2 h at 100,000g), and 1 mM MgCl<sub>2</sub> and 2 mM CaCl<sub>2</sub> were added for the pulldown assays (except where noted). For neurexin pull-downs, protein A-Sepharose containing Ig-fused neurexin-1β, -2 β or Ig-C control (~6, 9 and 5 µg protein) were added to 2 ml brain extract, and incubated overnight at 4 °C, then centrifuged (800g for 5 min), and washed five times with PBS containing 2 mM Ca<sup>2+</sup> and 1 mM Mg<sup>2+</sup>. For GST-CASK pulldowns, 5 ml brain extract was incubated with 50 µg immobilized GST-CASK PDZ-domain or GST alone overnight at 4 °C, beads were washed, and bound proteins were analyzed by SDS-PAGE and immunoblotting. For pulldowns from HEK293 cell lysates, cells were washed with PBS once, kept at -80°C overnight, thawed at 37°C for 1 min, and collect the cells and centrifuge at 2000g for 15 min at 4°C to get the cell pellet. Membrane proteins were extracted from the cell pellet for 1 h at 4 °C in 20 mM HEPES-NaOH pH 7.4 containing 1% Triton, 0.1 mM EDTA, 2 mM CaCl<sub>2</sub>, 1 mM MgCl<sub>2</sub> and 100 mM NaCl with protease inhibitors (1 mM PMSF, 1 µg/ml Pepstatin, 1 µg/ml Leupeptin and 2 µg/ml Aprotinin). Insoluble material was removed by centrifugation (10,000 g for 30 min), and supernatant was used for various pulldowns. All



pull-down experiments were done overnight at 4 °C, and bound proteins were eluted with sample buffer, and analyzed by immunoblotting with specific antibodies.

**Surface Plasmon Resonance measurements.** The recombinant extracellular N-terminal regions of the neurexin-1 $\beta$  (Araç et al., 2007) and of the rat GABA $\alpha$ 1-receptor (residues 28-251; see Suppl. Table 6) were expressed essentially as described (Araç et al., 2007); Garboczi et al., 1996). Surface plasmon resonance binding experiments were carried out at 25 °C in 10 mM HEPES-NaOH pH 7.4, 150 mM NaCl, 1 mM EDTA and 0.005% (v/v) surfactant P20 on a BIAcore T100 instrument. Control (inactive Botulinum neurotoxin A) and the GABA $\alpha$ 1-receptor protein were covalently attached to carboxymethylated dextran on a research grade CM5 chip (BIAcore, Uppsala, Sweden) by NHS/EDC amine coupling, with resonance units of 400 or 1000 for the GABA $\alpha$ 1-receptor. The measured binding affinities were similar in both cases. Neurexin-1 $\beta$  was injected over the GABA $\alpha$ 1-receptor surfaces at increasing concentrations (range: 1.14 nM – 30  $\mu$ M) in 3-fold increments, and each data point was measured twice. A flow rate of 50  $\mu$ l/min was used to minimize sample diffusion and mass transport limitations. Reference data obtained using a flow-cell with immobilized control protein were subtracted from the sample flow channels to obtain specific neurexin-1 $\beta$  binding. GABA $\alpha$ 1-receptor surfaces were regenerated by injection of a regeneration solution (10 mM HEPES-NaOH pH7.4, 0.15 M NaCl, 1 mM EDTA and 0.005% P20). For analysis of steady-state binding affinities, the magnitude of the response at the end of each injection were measured, and fitted using a single-site stoichiometry model.

**Neuronal cultures, calcium-phosphate transfection and lentiviral infection.** Primary hippocampal neurons were isolated from P1-3 pups of wild-type mice, and dissociated by papain digestion as described (Maximov et al., 2007). The neurons were plated on poly-D-lysine-coated glass coverslips and maintained at 37 °C for 13-15 days. Hippocampal neuronal cultures were transfected with various cDNA constructs at 10 days in vitro (DIV) using a calcium-phosphate transfection method modified from the ClonTech CalPhos transfection protocol. Briefly, the DNA/Ca<sup>2+</sup>/HBS mixture was added to the culture for 20-25 min at 37 °C, and the cells were washed with MEM three times and kept in the incubator for 3-4 days before recording. Typically, 1-2 % of neurons were transfected as assessed by counting EGFP-positive neurons. In all transfection experiments, pCMV5

backbone vector was used as control, and vector expressing CFP was co-transfected with the indicated plasmids for visualization. All transfections used the same total amount of plasmids (3  $\mu$ g plus 1  $\mu$ g of CFP plasmid for visualization); for control transfections, empty pCMV5 vector was used to substitute for the expression vectors. In neurexin triple knockdown transfection experiments, three vectors encoding shRNA against neurexin-1, -2 and -3 (NRXN1\_9, NRXN2\_15 and NRXN3\_29) were co-transfected with CFP-expressing vector using the calcium-phosphate transfection method. Lentiviruses were produced by transfecting human embryonic kidney HEK293 cells (CRL-11268, ATCC) with the respective pFUGW vectors and two helper plasmids (pVSVg and pCMV $\Delta$ 8.9) using FUGENE 6. Viruses were harvested 48 hr after transfection by collecting the medium from transfected cells. Neurons were infected with 0.2-0.5 ml conditioned HEK293 cell medium for each 24-well of high-density neurons at DIV1-2, and the medium was exchanged to normal growth medium at DIV4, then kept until DIV13–15 for biochemical and electrophysiological analyses. To screen the efficiency of various neurexin knockdown constructs, mouse cortical neurons were infected at DIV4 and harvested on DIV13 for mRNA measurement. For all experiments, expression of exogenous proteins in neurons was confirmed by immunoblotting and CFP fluorescence. All mRNA measurements were performed using Taqman assays in an ABI qRT-PCR instrument.

**Morphological studies.** Immunofluorescence analyses of cultured neurons were performed essentially as described (Chubykin et al., 2007). Briefly, cultured neurons (14 DIV) were rinsed with PBS, fixed with 100% methanol at -20°C for 10 min, blocked in 3% milk, 0.1% saponin/PBS (PBSS) for 60 min, and then incubated with primary antibodies for 1 h at room temperature. After rinsing three times with PBBS, the neurons were incubated with fluorescent secondary antibodies for 30 min in the dark at room temperature, washed 5 times, and mounted with Vectashield mounting medium (H-1000, Vector labs). Confocal microscopy was performed with a Zeiss LSM 510 Meta microscope. Identical acquisition settings were applied to all samples of the experiment. Images of neurons were collected with 63x oil-immersion objective. Stacks of z-section images obtained by confocal microscopy were converted to maximal projection images and analyzed blindly using the NIH Image/ImageJ program.

**Electrophysiological recordings.** Electrophysiological recordings were performed as previously reported (Maximov et al., 2007). Neurons were patched and kept in voltage-clamp whole-cell configuration using a Multiclamp 700A amplifier (Molecular Devices). Synaptic responses were evoked by 0.5 ms current injection (90~100  $\mu$ A) through a concentric bipolar electrode (FHC, CBAEC75) with an Isolated Pulse Stimulator (Model 2000, A-M Systems, Inc.). Data were digitized at 10 kHz with a 2 kHz low-pass filter. For whole-cell patch-clamp recordings, the pipette solution contained (in mM): 145 CsCl, 5 NaCl, 10 HEPES-CsOH pH 7.2, 5 EGTA, 5 QX-314, 4 MgATP and 0.3 Na<sub>2</sub>GTP, 305 mOsm. The bath solution contained (in mM): 150 NaCl, 4 KCl, 2 CaCl<sub>2</sub>, 1 MgCl<sub>2</sub>, 10 HEPES-NaOH pH 7.4, 10 glucose, 315 mOsm. Evoked IPSCs were pharmacologically isolated by adding 10  $\mu$ M CNQX to the bath solution. Evoked EPSCs were pharmacologically isolated by adding 100  $\mu$ M picrotoxin to the bath solution. Tetrodotoxin (1  $\mu$ M) was added to the bath to block evoked synaptic responses for mEPSC/mIPSC recordings. The readily-releasable pool was measured by background perfusion of hypertonic sucrose (0.5 M) into the bath solution at a speed of 2 ml/min. Series resistance was compensated to 60%–70%, and recordings with series resistances of >20 M $\Omega$  were rejected. Data were analyzed using Clampfit 9.02 (Molecular Devices) and Igor 4.0 (Wavemetrics). Data are shown as means  $\pm$  SEMs. Statistical significance was determined by the Student's t test except for the cumulative graphs in Suppl. Fig. 1, which used the Kolmogorov-Smirnov test.

**Miscellaneous.** SDS-PAGE and immunoblotting were performed using standard procedures. <sup>125</sup>I-labeled secondary antibodies were employed for quantitative analyses followed by PhosphorImager detection (Molecular Dynamics). Most antibodies employed were previously characterized (Ichtchenko et al., 1995; Song et al., 1999; Sugita et al., 2001; Ushkaryov et al., 1992). The antibodies that were used to detect GABA<sub>A</sub> $\alpha$ 1 were purchased from Santa Cruz (sc-7348, 1:200) or Alomone Labs (AGA-001, 1:200). HEK293 cells stably expressing GABA<sub>A</sub> receptors were purchased from ATCC (CRL-2029).

## Supplemental References

Boucard, A.A., Chubykin, A.A., Comoletti, D., Taylor, P., and Südhof, T.C. (2005). A splice code for trans-synaptic cell adhesion mediated by binding of neuroligin-1 to alpha- and beta-neurexins. *Neuron* 48, 229-236.

Chubykin, A.A., Atasoy, D., Etherton, M.R., Brose, N., Kavalali, E.T., Gibson, J.R., and Südhof, T.C. (2007). Activity-dependent validation of excitatory versus inhibitory synapses by neuroligin-1 versus neuroligin-2. *Neuron* 54, 919-931.

Gallagher, M.J., Shen, W., Song, L., and Macdonald, R.L. (2005). Endoplasmic reticulum retention and associated degradation of a GABAA receptor epilepsy mutation that inserts an aspartate in the M3 transmembrane segment of the alpha1 subunit. *J. Biol. Chem.* 280, 37995-38004.

Ichtchenko, K., Hata, Y., Nguyen, T., Ullrich, B., Missler, M., Moomaw, C., and Südhof, T.C. (1995). Neuroligin-1: a splice site-specific ligand for beta-neurexins. *Cell* 81, 435-443.  
Lois, C., Hong, E.J., Pease, S., Brown, E.J., and Baltimore, D. (2002). Germline transmission and tissue-specific expression of transgenes delivered by lentiviral vectors. *Science* 295, 868-872.

Maximov A., Südhof T.C. (2005). Autonomous function of synaptotagmin 1 in triggering synchronous release independent of asynchronous release. *Neuron* 48:547-554.

Maximov, A., Pang, Z.P., Tervo, D.G., and Südhof, T.C. (2007). Monitoring synaptic transmission in primary neuronal cultures using local extracellular stimulation. *J. Neurosci. Methods* 161, 75-87.

Maximov A., Tang J., Yang X., Pang Z.P., Südhof T.C. (2009) Complexin controls the force transfer from SNARE complexes to membranes in fusion. *Science* 323:516-521.

Mukherjee, K., Sharma, M., Urlaub, H., Bourenkov, G.P., Jahn, R., Südhof, T.C., and Wahl, M.C. (2008). CASK Functions as a Mg<sup>2+</sup>-independent neurexin kinase. *Cell* 133, 328-339.

Song, J.Y., Ichtchenko, K., Südhof, T.C., and Brose, N. (1999). Neuroligin-1 is a postsynaptic cell-adhesion molecule of excitatory synapses. *Proc. Natl. Acad. Sci.* 96, 1100-1105.

Sugita, S., Saito, F., Tang, J., Satz, J., Campbell, K., and Südhof, T.C. (2001). A stoichiometric complex of neurexins and dystroglycan in brain. *J. Cell Biol.* 154, 435-445.

Ushkaryov, Y.A., Hata, Y., Ichtchenko, K., Moomaw, C., Afendis, S., Slaughter, C.A., and Südhof, T.C. (1994). Conserved domain structure of beta-neurexins. Unusual cleaved signal sequences in receptor-like neuronal cell-surface proteins. *J. Biol. Chem.* 269, 11987-11992.

Ushkaryov, Y.A., Petrenko, A.G., Geppert, M., and Südhof, T.C. (1992). Neurexins: synaptic cell surface proteins related to the alpha-latrotoxin receptor and laminin. *Science* 257, 50-56.
